# Supplementary material
Source: PubMed Central journal article supplement (PMC4177270)

**FIGURE LEGEND**

Figure 1; (online) Diagram of Oral Sensorimotor and Feeding Data Collection Tool<sup>®</sup>.

(\_) the number in each category

\*Statistical association with 7-dehydrocholesterol:  $p < .001$

ACCEPTED MANUSCRIPT

Figure 1 online

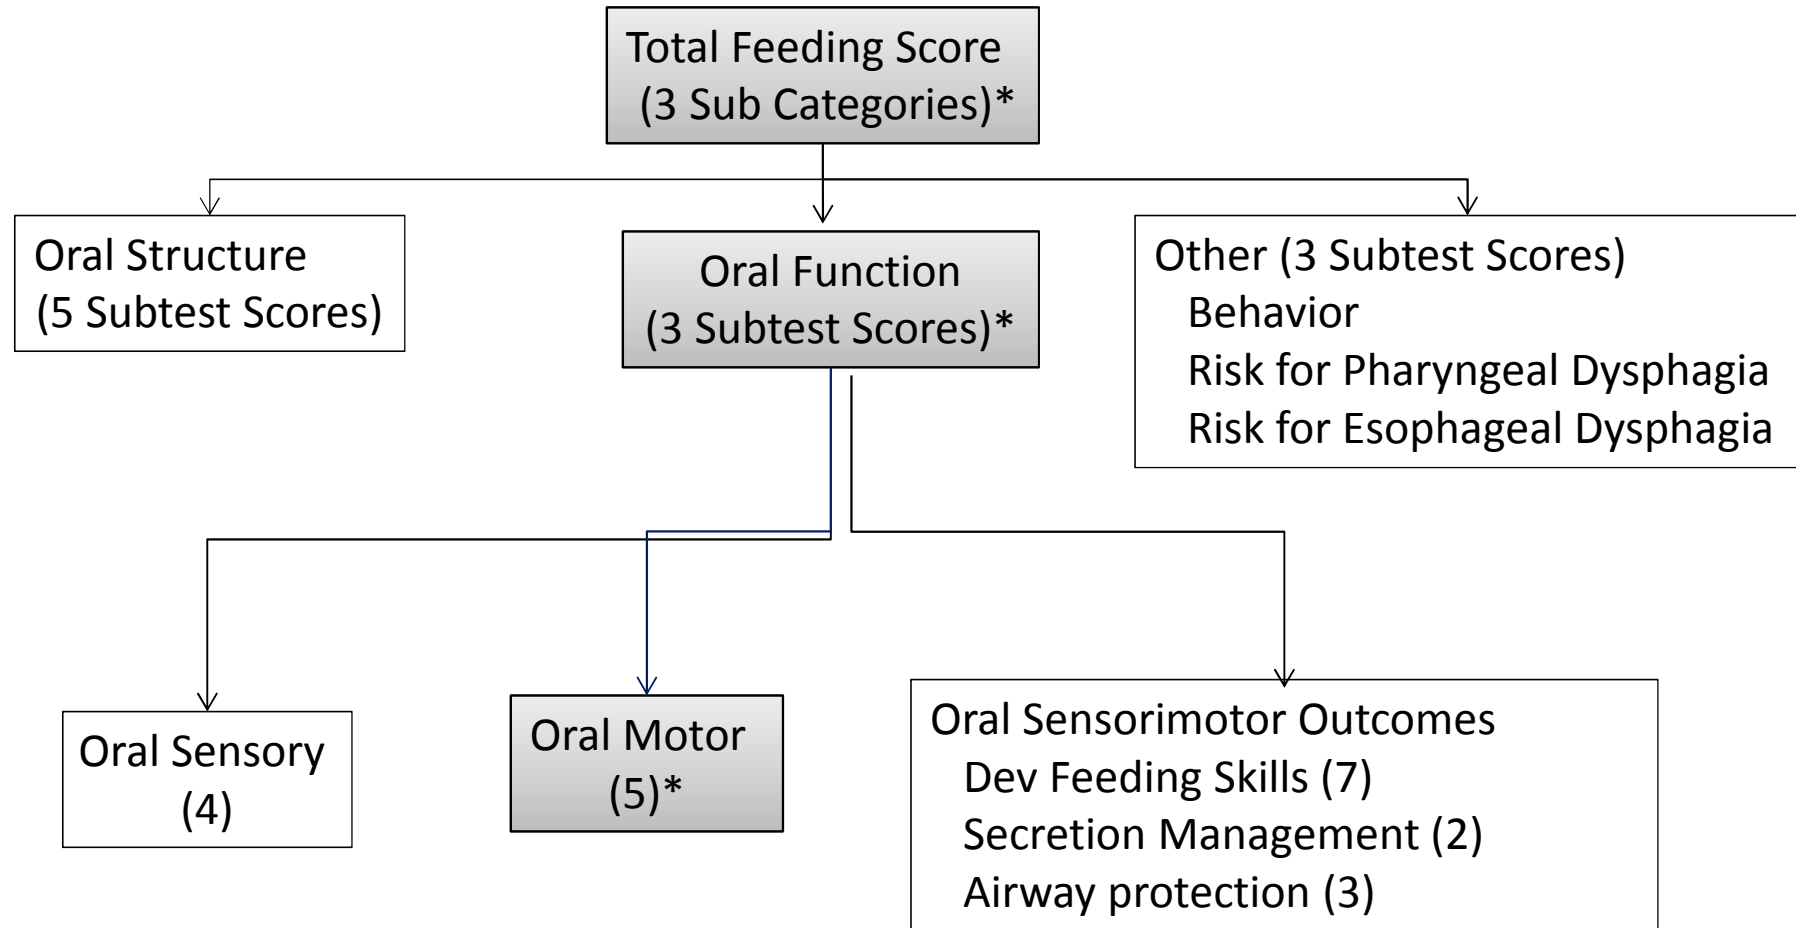

Supplement: NIHMS614531-supplement-supplement_1.pdf [file NIHMS614531-supplement-supplement_1.pdf]
